# Supplementary material for: Iridium-Based Nanohybrids: Synthesis, Characterization, Optical Limiting, and Nonlinear Optical Properties
Source: MDPI journal article supplement (doi:10.3390/nano13142131), 2023-07-22
Supplement: s1 [file s1]

# Supporting Information

## Iridium-Based Nanohybrids: Synthesis, Characterization, Optical Limiting, and Nonlinear Optical Properties

Nikolaos Chazapis <sup>1,2</sup>, Michalis Stavrou <sup>1,2</sup>, Georgia Papaparaskeva <sup>3</sup>, Alexander Bunge <sup>4</sup>, Rodica Turcu <sup>4</sup>, Theodora Krasia-Christoforou <sup>3,\*</sup> and Stelios Couris <sup>1,2,\*</sup>

<sup>1</sup> Department of Physics, University of Patras, 26504 Patras, Greece; n.chazapis@iceht.forth.gr (N.C.); m.stavrou@iceht.forth.gr (M.S.)

<sup>2</sup> Institute of Chemical Engineering Sciences (ICE-HT), Foundation for Research and Technology-Hellas (FORTH), 26504 Patras, Greece

<sup>3</sup> Department of Mechanical and Manufacturing Engineering, University of Cyprus, 1 Panepistimiou Avenue, 2109, Aglantzia, Nicosia, Cyprus; papaparaskeva.georgia@ucy.ac.cy

<sup>4</sup> National Institute R&D of Isotopic and Molecular Technologies, 400293 Cluj-Napoca, Romania; alexander.bunge@itim-cj.ro (A.B.); rodica.turcu@itim-cj.ro (R.T.)

\* Correspondence: krasia.theodora@ucy.ac.cy (T.K.-C.); couris@upatras.gr (S.C.)

## Tauc plots

The optical band gap energy,  $E_g$ , of the PVP-IrO<sub>2</sub> system was estimated by extrapolating the linear part of curve  $(\alpha_0 h\nu)^2$  with the incident energy ( $h\nu$ ) to the x-axis at  $(\alpha_0 h\nu)^2 = 0$ , according to Tauc equation [S1]:

$$\alpha_0 h\nu = C(h\nu - E_g)^n$$

where  $h$  is the Planck's constant,  $\nu$  is the photon's frequency,  $C$  is a constant and  $n=1/2$  for direct allowed transitions.

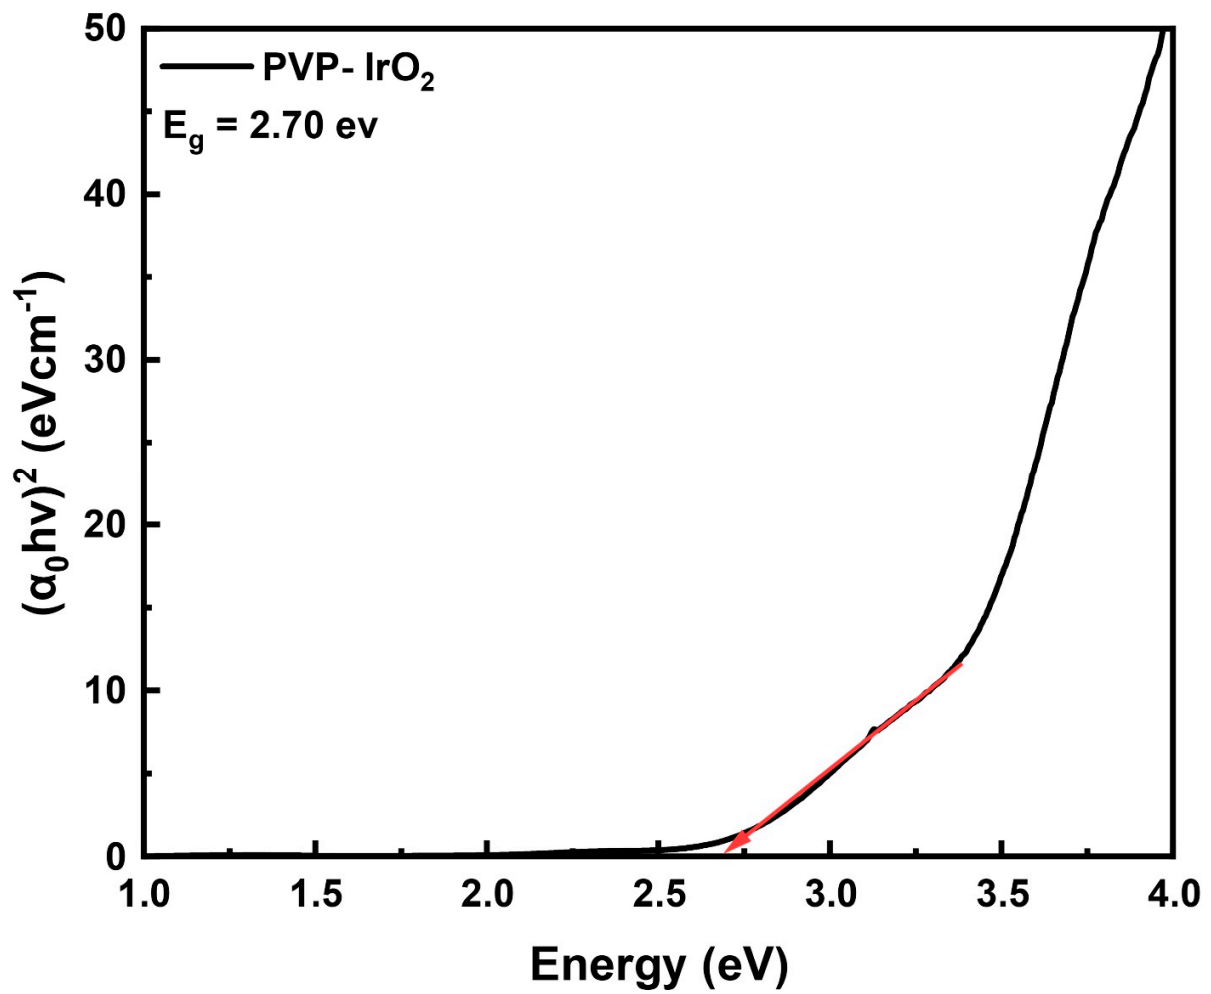

**Figure S1.** Tauc plots of PVP-IrO<sub>2</sub> for direct optical transitions.

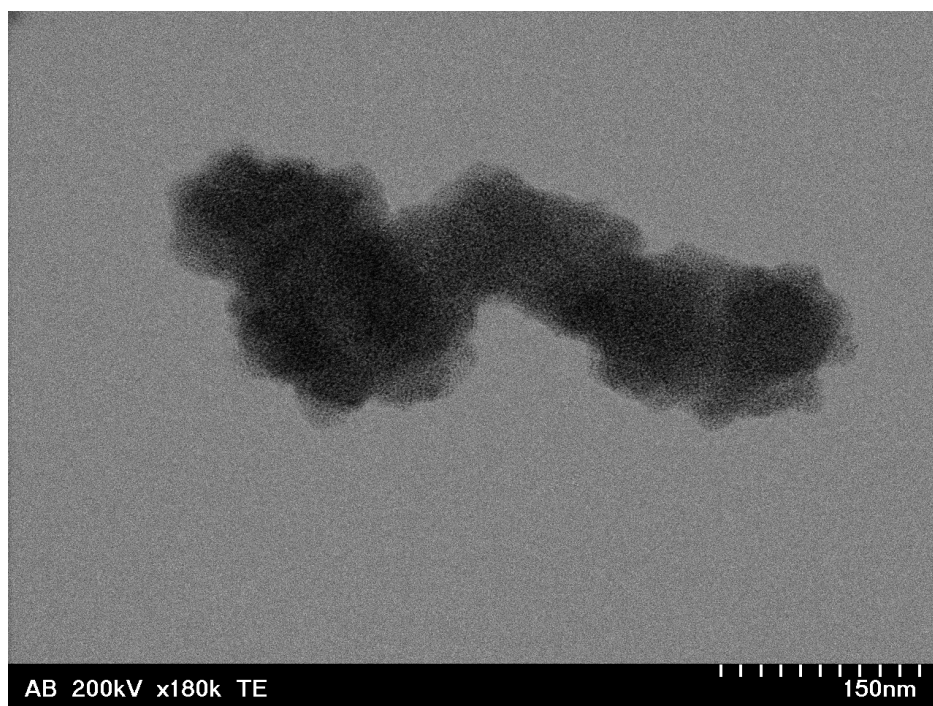

**Figure S2.** TEM image of sample I (Ir/IrO<sub>2</sub>).

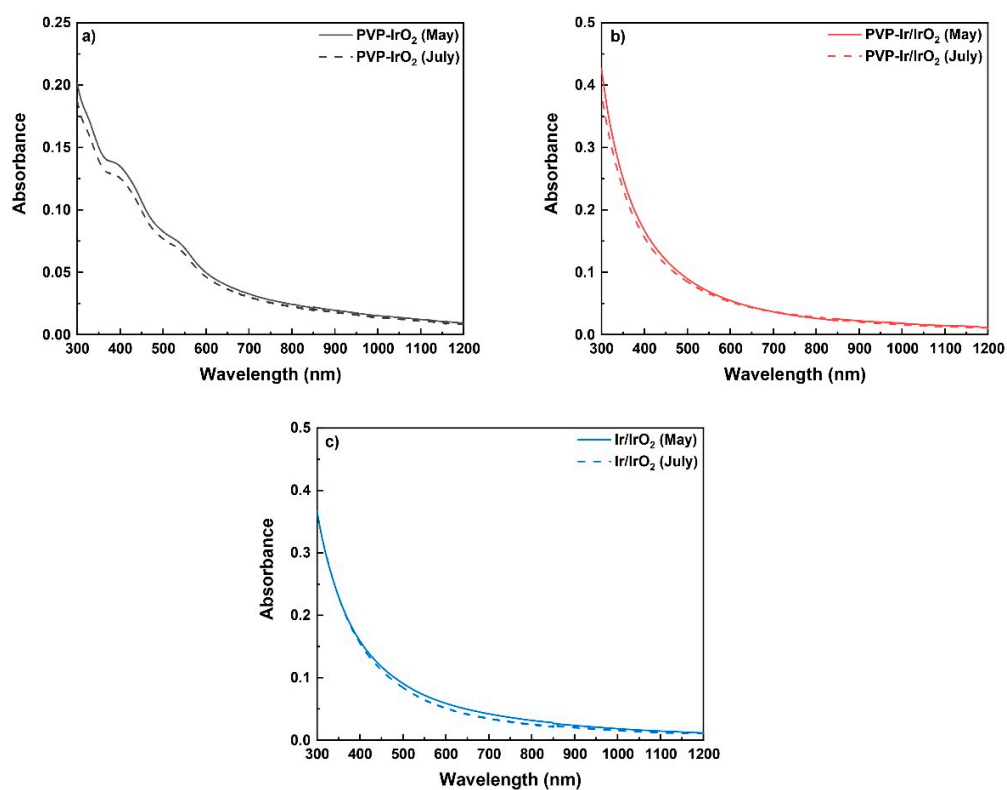

**Figure S3:** UV-Vis-NIR absorption spectra of (a) PVP-IrO<sub>2</sub>, (b) PVP-Ir/IrO<sub>2</sub> and (c) Ir/IrO<sub>2</sub> nanohybrid solutions in different periods.

**Table S1.** NLO refraction of PVP-IrO<sub>2</sub>, PVP-Ir/IrO<sub>2</sub>, Ir/IrO<sub>2</sub>, Au, ZnO,  $\gamma$ -Fe<sub>2</sub>O<sub>3</sub>, poly(sodium-4-styrenesulfonate) (PSS)-Cu(OH)<sub>2</sub>, PSS-Cu(OH)<sub>2</sub>/CuO and PVP/Pd nanoparticles.

| Sample                                   | Excitation conditions | $\alpha_0$ (cm <sup>-1</sup> ) | $\gamma'$<br>( $\times 10^{-21}$ m <sup>2</sup> /W) | $\text{Re}\chi^{(3)}$<br>( $\times 10^{-16}$ esu) | $\text{Re}\chi^{(3)}/\alpha_0$<br>( $\times 10^{-16}$ ) esu cm | Ref.      |
|------------------------------------------|-----------------------|--------------------------------|-----------------------------------------------------|---------------------------------------------------|----------------------------------------------------------------|-----------|
| PVP-IrO <sub>2</sub>                     | 4 ns,<br>532 nm       | 1.77                           | -89.8                                               | -100.5                                            | 59.1                                                           | this work |
| PVP-Ir/IrO <sub>2</sub>                  | 4 ns,<br>532 nm       | 1.8                            | -20.0                                               | -22.4                                             | 12.4                                                           |           |
| Ir/IrO <sub>2</sub>                      | 4 ns,<br>532 nm       | 1.79                           | -19.9                                               | -22.3                                             | 12.4                                                           |           |
| PVP-IrO <sub>2</sub>                     | 4 ns, 1064 nm         | 0.39                           | $-28 \pm 4$                                         | $31.9 \pm 5.0$                                    | $82.9 \pm 12.0$                                                |           |
| PVP-Ir/IrO <sub>2</sub>                  | 4 ns, 1064 nm         | 0.38                           | $-7.8 \pm 0.4$                                      | $8.7 \pm 0.4$                                     | $22.6 \pm 1.0$                                                 |           |
| Ir/IrO <sub>2</sub>                      | 4 ns, 1064 nm         | 0.43                           | $-13.3 \pm 2.0$                                     | $14.7 \pm 2.0$                                    | $34.0 \pm 4.0$                                                 |           |
| PVP/Pd                                   | 4 ns, 532 nm          | 7.5                            | -238                                                | -330.5                                            | 44.1                                                           | S2        |
|                                          | 4 ns, 1064 nm         | 6.8                            | -109                                                | -151.4                                            | 22.3                                                           |           |
| PSS-Cu(OH) <sub>2</sub>                  | 4 ns, 532 nm          | 1                              | -121                                                | -136                                              | 136                                                            | S3        |
| PSS-Cu(OH) <sub>2</sub> /CuO             | 4 ns, 532 nm          | 6.8                            | -436                                                | -489                                              | -489                                                           |           |
| $\gamma$ -Fe <sub>2</sub> O <sub>3</sub> | 4 ns, 532 nm          | ~5.1                           | N/A                                                 | -9.1                                              | 1.8                                                            | S4        |
|                                          | 4 ns, 1064 nm         | ~1.15                          | N/A                                                 | 3.7                                               | 3.2                                                            |           |
| Au                                       | 4 ns, 532 nm          | ~0.9                           | -30.1                                               | -33.7                                             | 37.4                                                           | S5        |
| ZnO                                      | 10 ns, 532 nm         | ~N/A                           | 120                                                 | 530                                               | N/A                                                            | S6        |

## References

1. Tauc, J. Optical Properties and Electronic Structure of Amorphous Ge and Si. *Mater. Res. Bull.* **1968**, *3*, 37–46.
2. Papagiannouli, I.; Potamianos, D.; Krasia-Christoforou, T.; Couris, S. Third-Order Optical Nonlinearities of PVP/Pd Nanohybrids. *Opt. Mater.* **2017**, *72*, 226–232.
3. Stavrou, M.; Papapaskeva, G.; Stathis, A.; Stylianou, A.; Turcu, R.; Krasia-Christoforou, T.; Couris, S. Synthesis, Characterization and Nonlinear Optical Response of Polyelectrolyte-Stabilized Copper Hydroxide and Copper Oxide Colloidal Nanohybrids. *Opt. Mater.* **2021**, *119*, 111329
4. Chatzikyriakos, G.; Iliopoulos, K.; Bakandritsos, A.; Couris, S. Nonlinear Optical Properties of Aqueous Dispersions of Ferromagnetic  $\gamma$ -Fe<sub>2</sub>O<sub>3</sub> Nanoparticles. *Chem. Phys. Lett.* **2010**, *493*, 314–318
5. Papagiannouli, I.; Aloukos, P.; Rioux, D.; Meunier, M.; Couris, S. Effect of the Composition on the Nonlinear Optical Response of Au<sub>x</sub>Ag<sub>1-x</sub> Nano-Alloys. *J. Phys. Chem. C* **2015**, *119*, 6861–6872
6. Abrinaei, F.; Molahasani, N. Effects of Mn Doping on the Structural, Linear, and Nonlinear Optical Properties of ZnO Nanoparticles. *J. Opt. Soc. Am. B* **2018**, *35*, 2015
